# Supplementary material
Source: PubMed Central journal article supplement (PMC9283336)

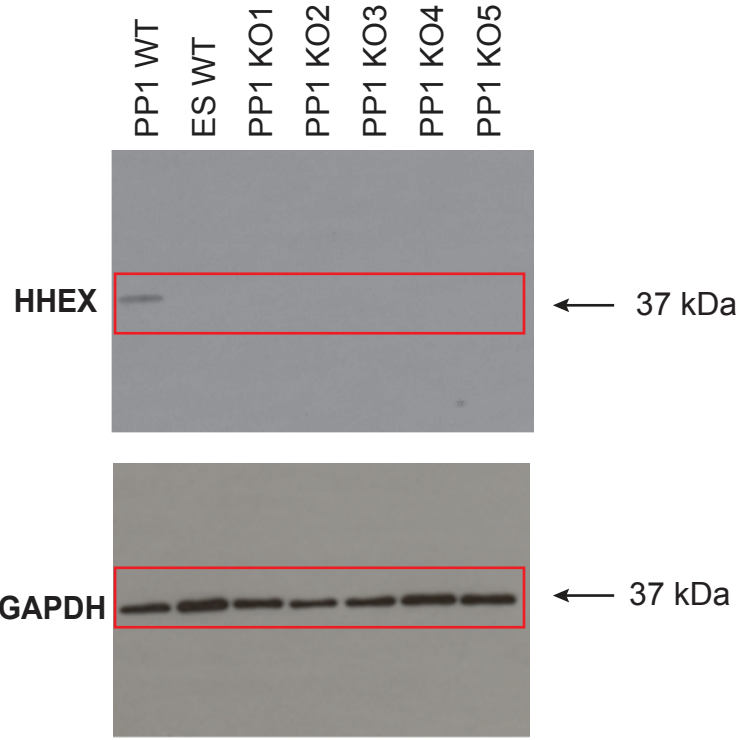

Supplement: NIHMS1817654-supplement-1817654_SD_Fig_3_unprocessed_western_blot.pdf [file NIHMS1817654-supplement-1817654_SD_Fig_3_unprocessed_western_blot.pdf]
